# Supplementary material
Source: PubMed Central journal article supplement (PMC3320929)

# Supportive Figures

Fig. S1

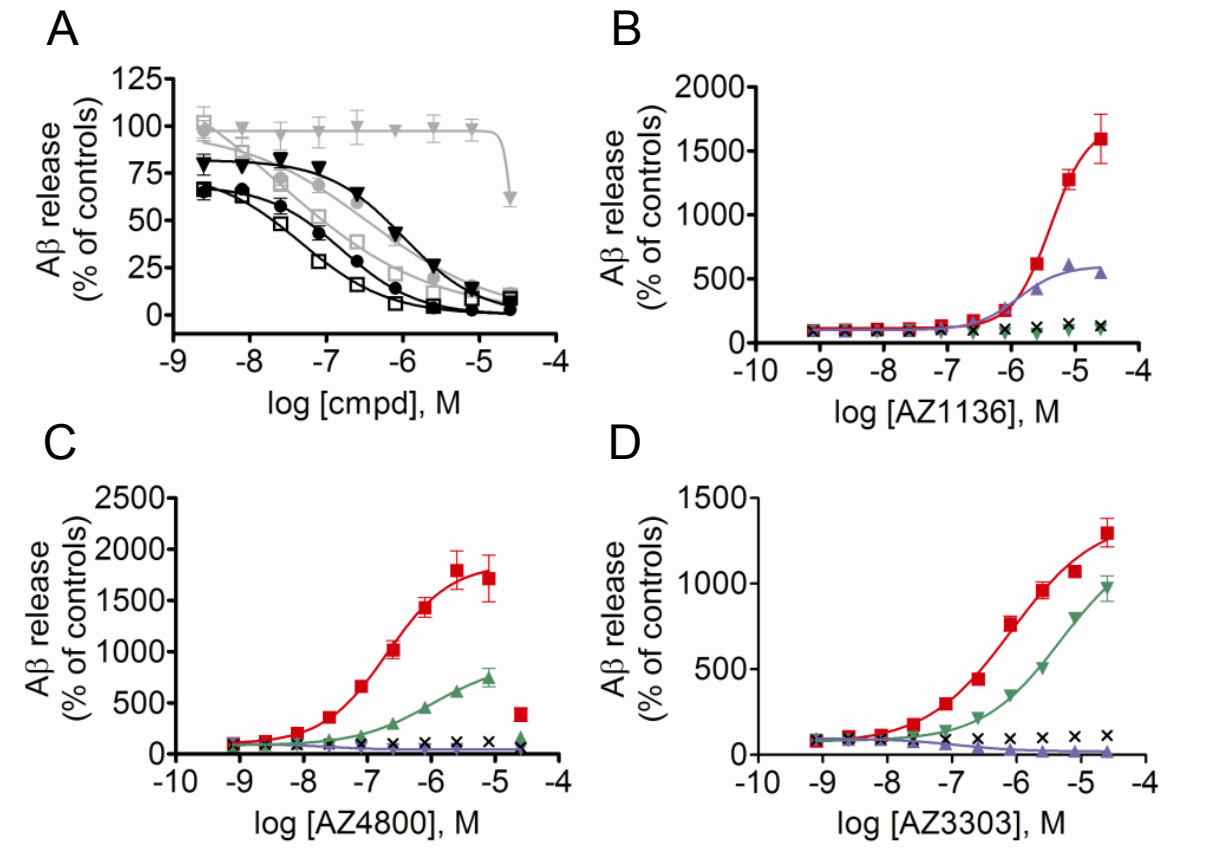

Fig. S2

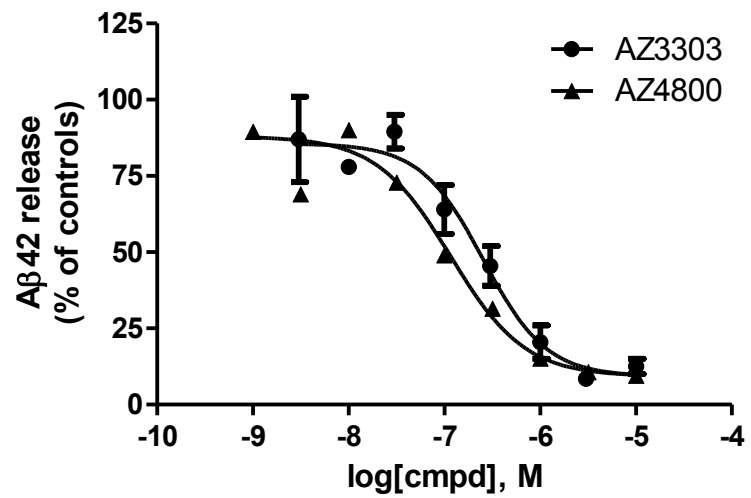

Fig. S3

A

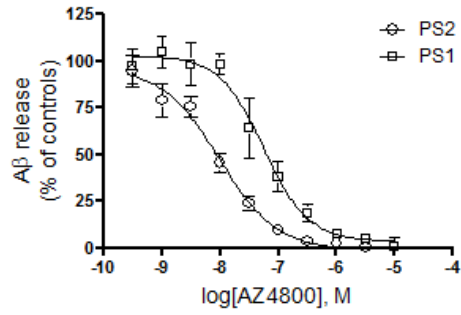

B

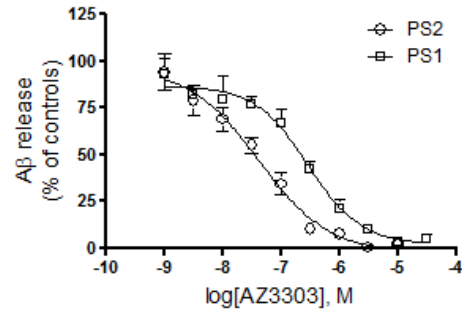

C

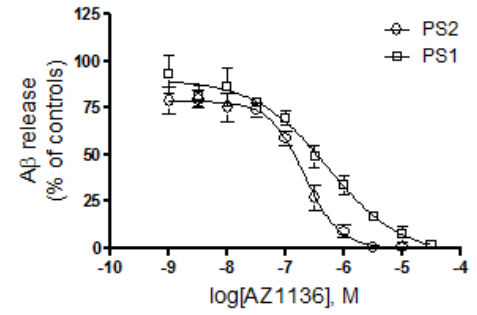

D

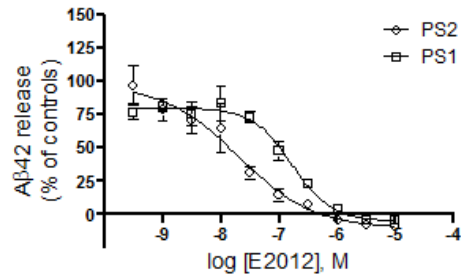

E

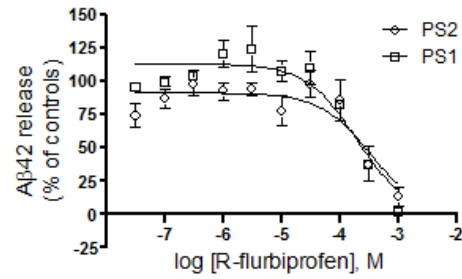

F

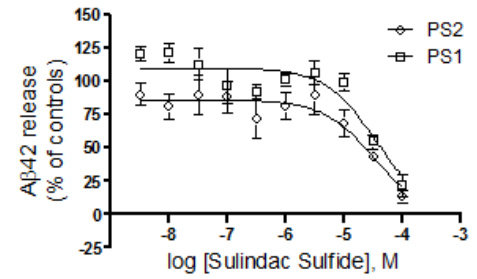

Fig. S4

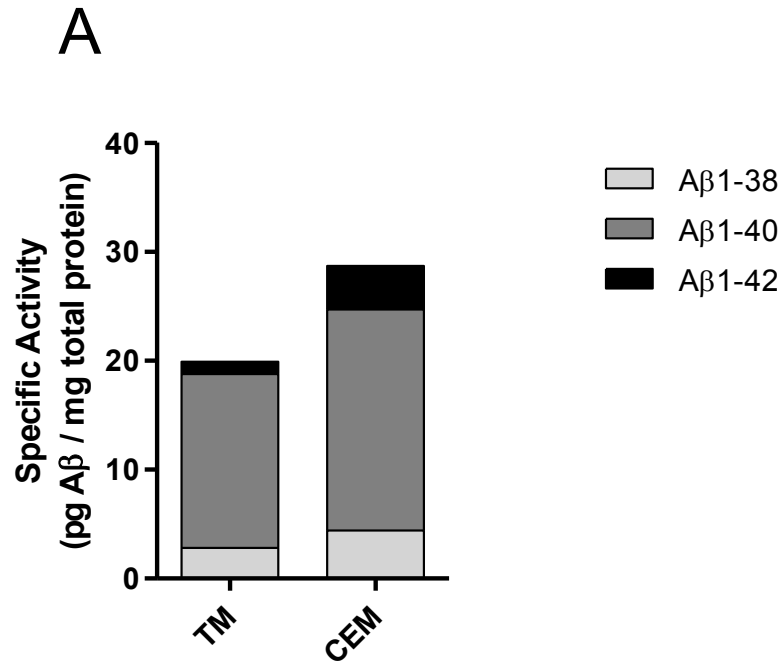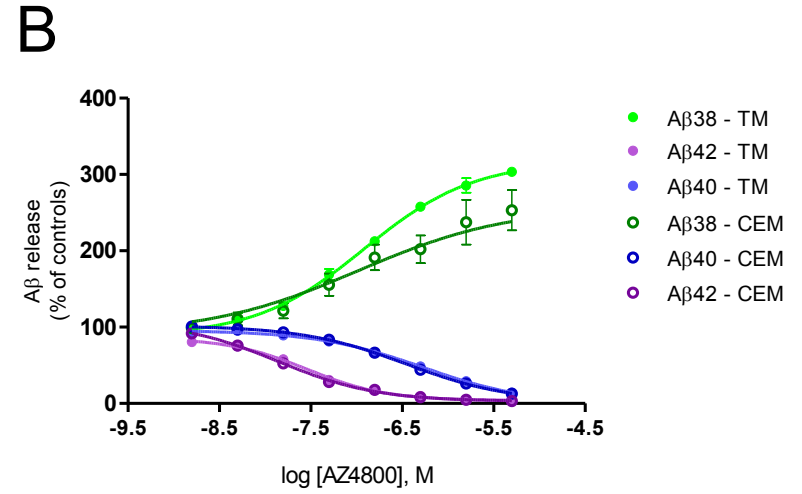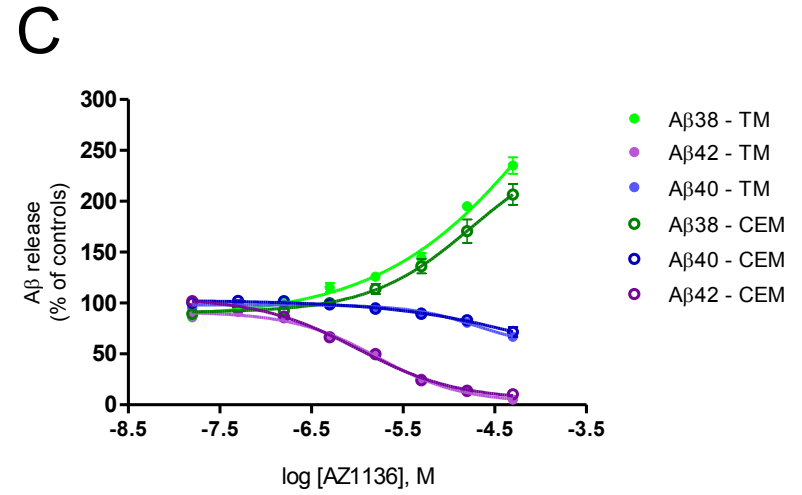

Fig. S5

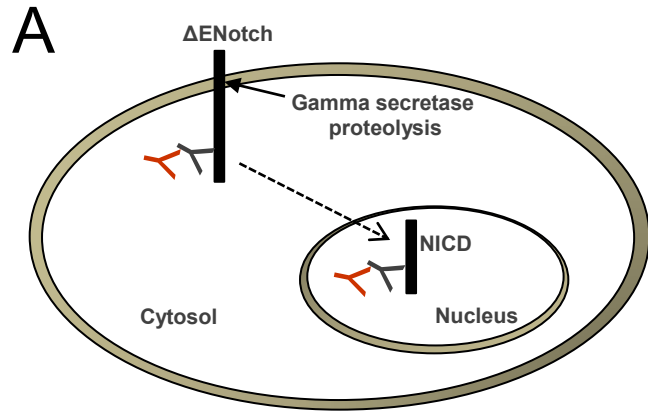

**B**

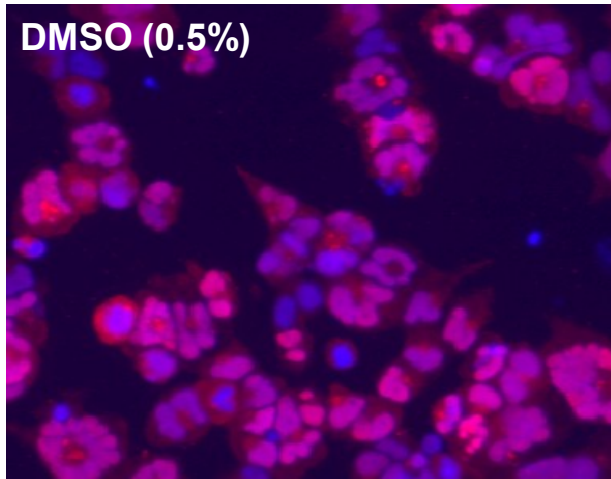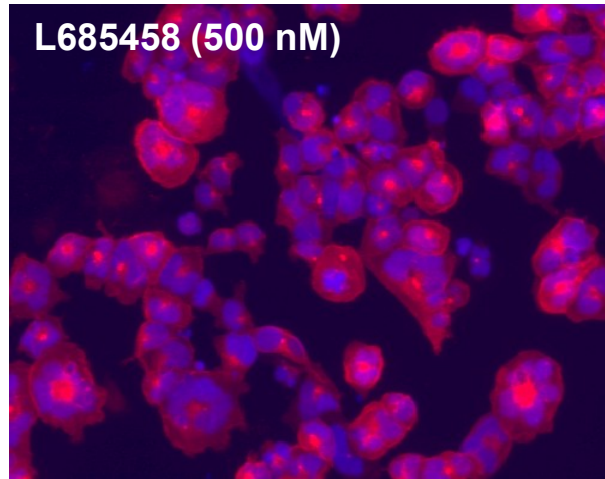

# Fig. S6

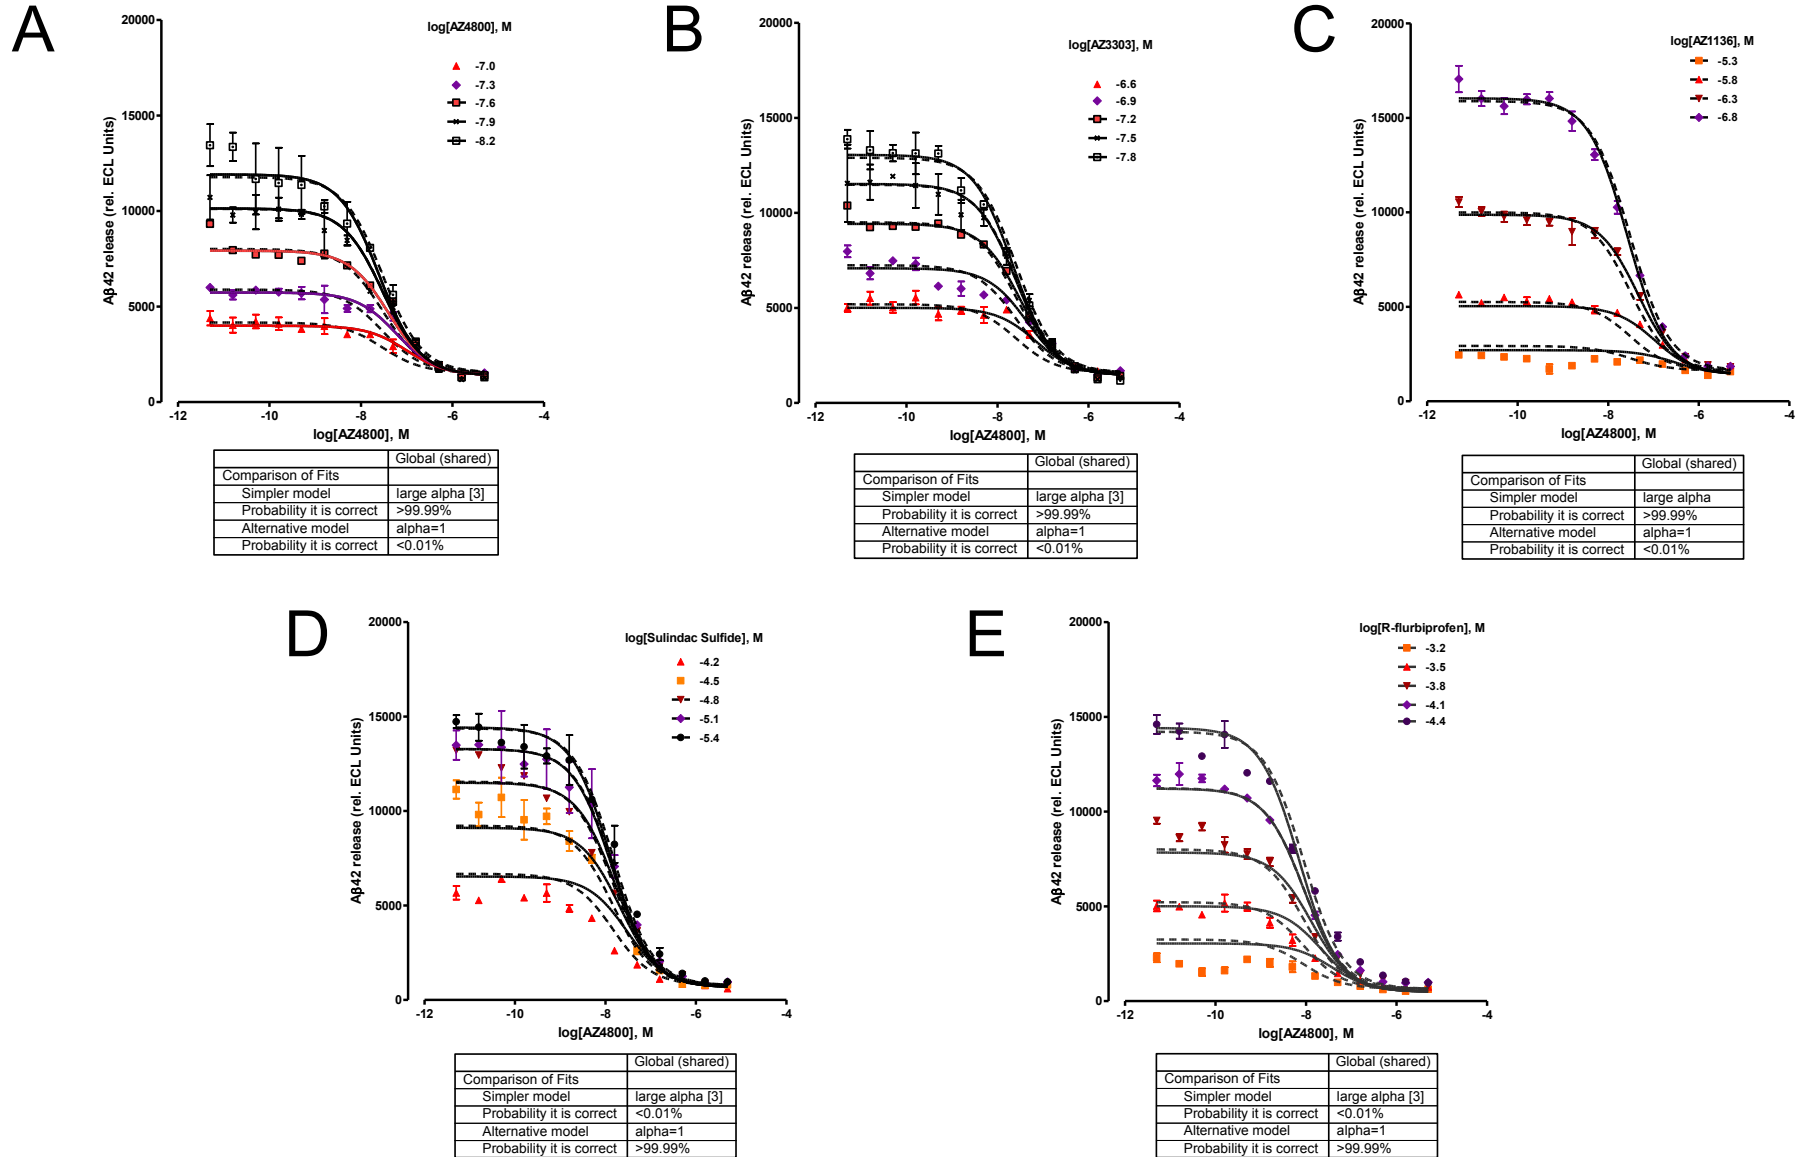

Fig. S7

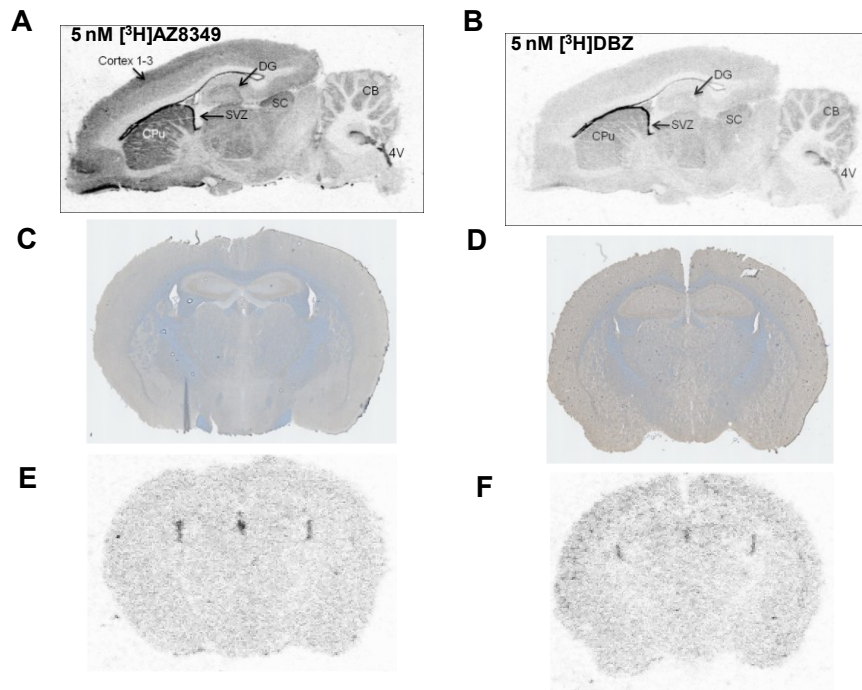

Supplement: supp_M111.305227_Suppl_Figs.pdf [file supp_M111.305227_Suppl_Figs.pdf]
